# Supplementary material for: Evaluation of antimicrobial activity of chondrillasterol isolated from Vernonia adoensis (Asteraceae)
Source: Springer Nature journal article supplement (doi:10.1186/s12906-019-2657-7), 2019-09-06
Supplement: MOESM1 [file 17146788]

F10

AV500Dec14-2017-mh/20  
Winnie F 10(b1) \* ca. 10mg i. 0.65ml CD2Cl2 \* 1H \* AV500

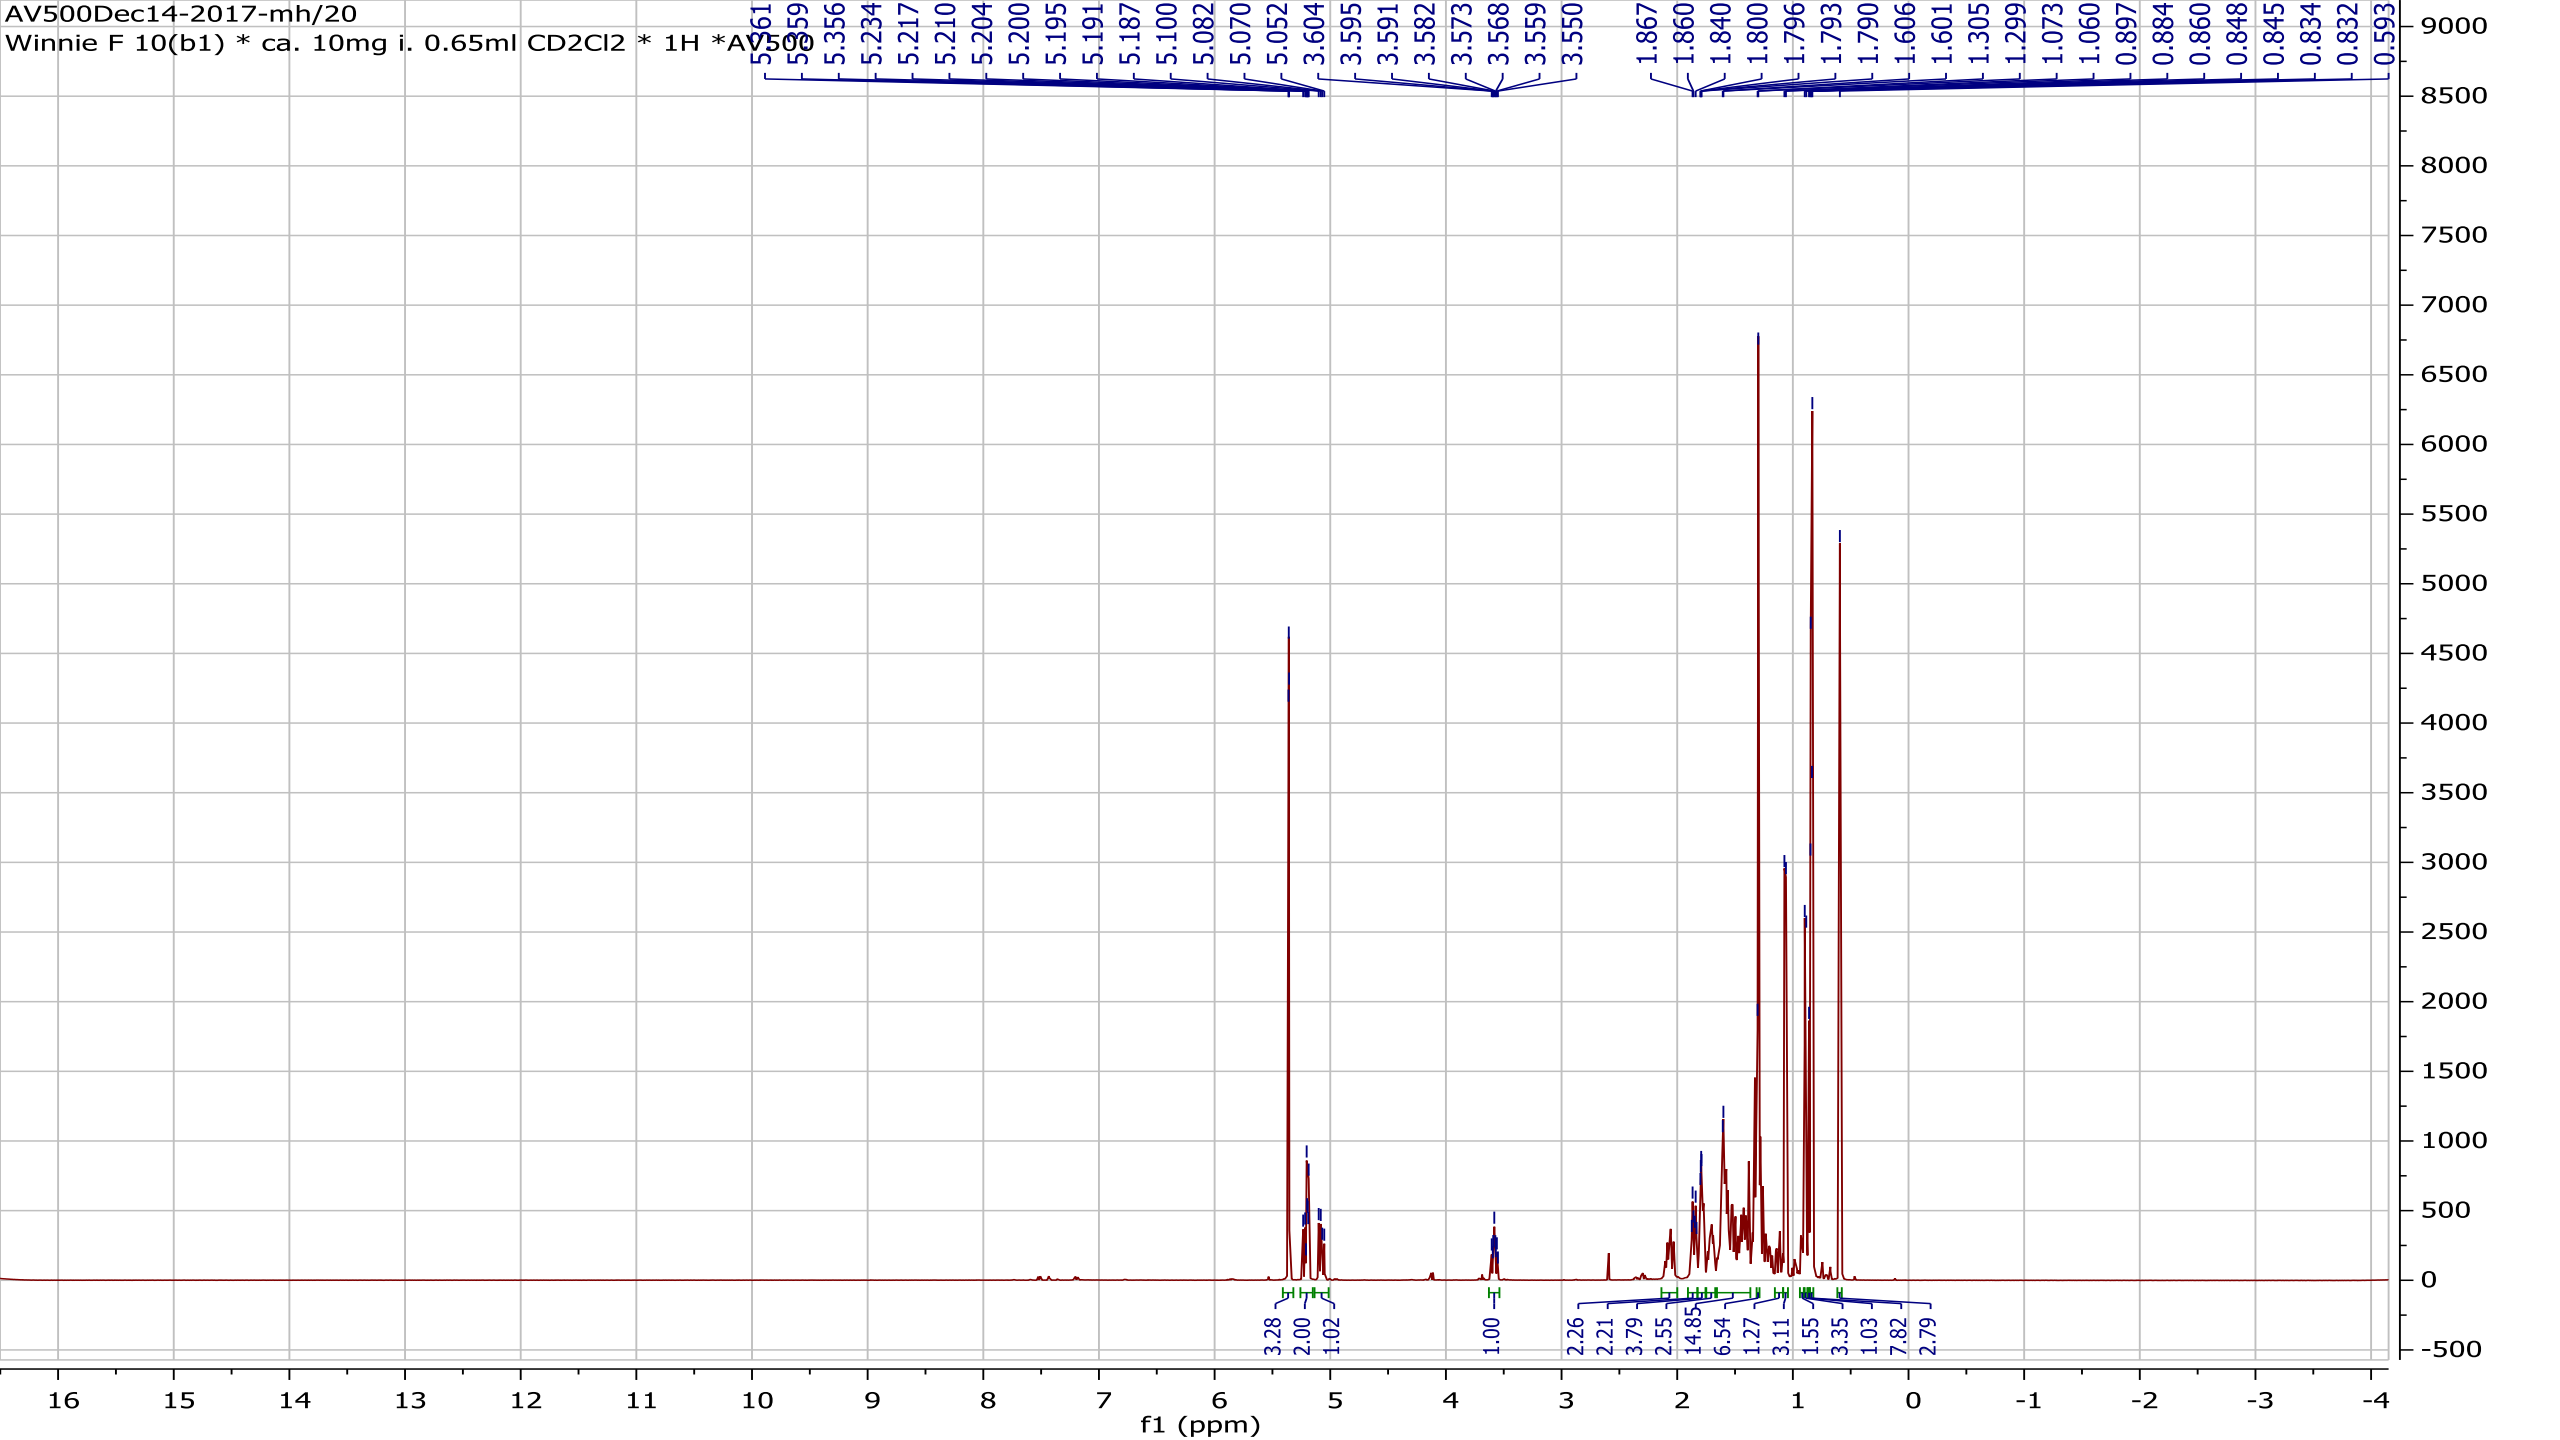

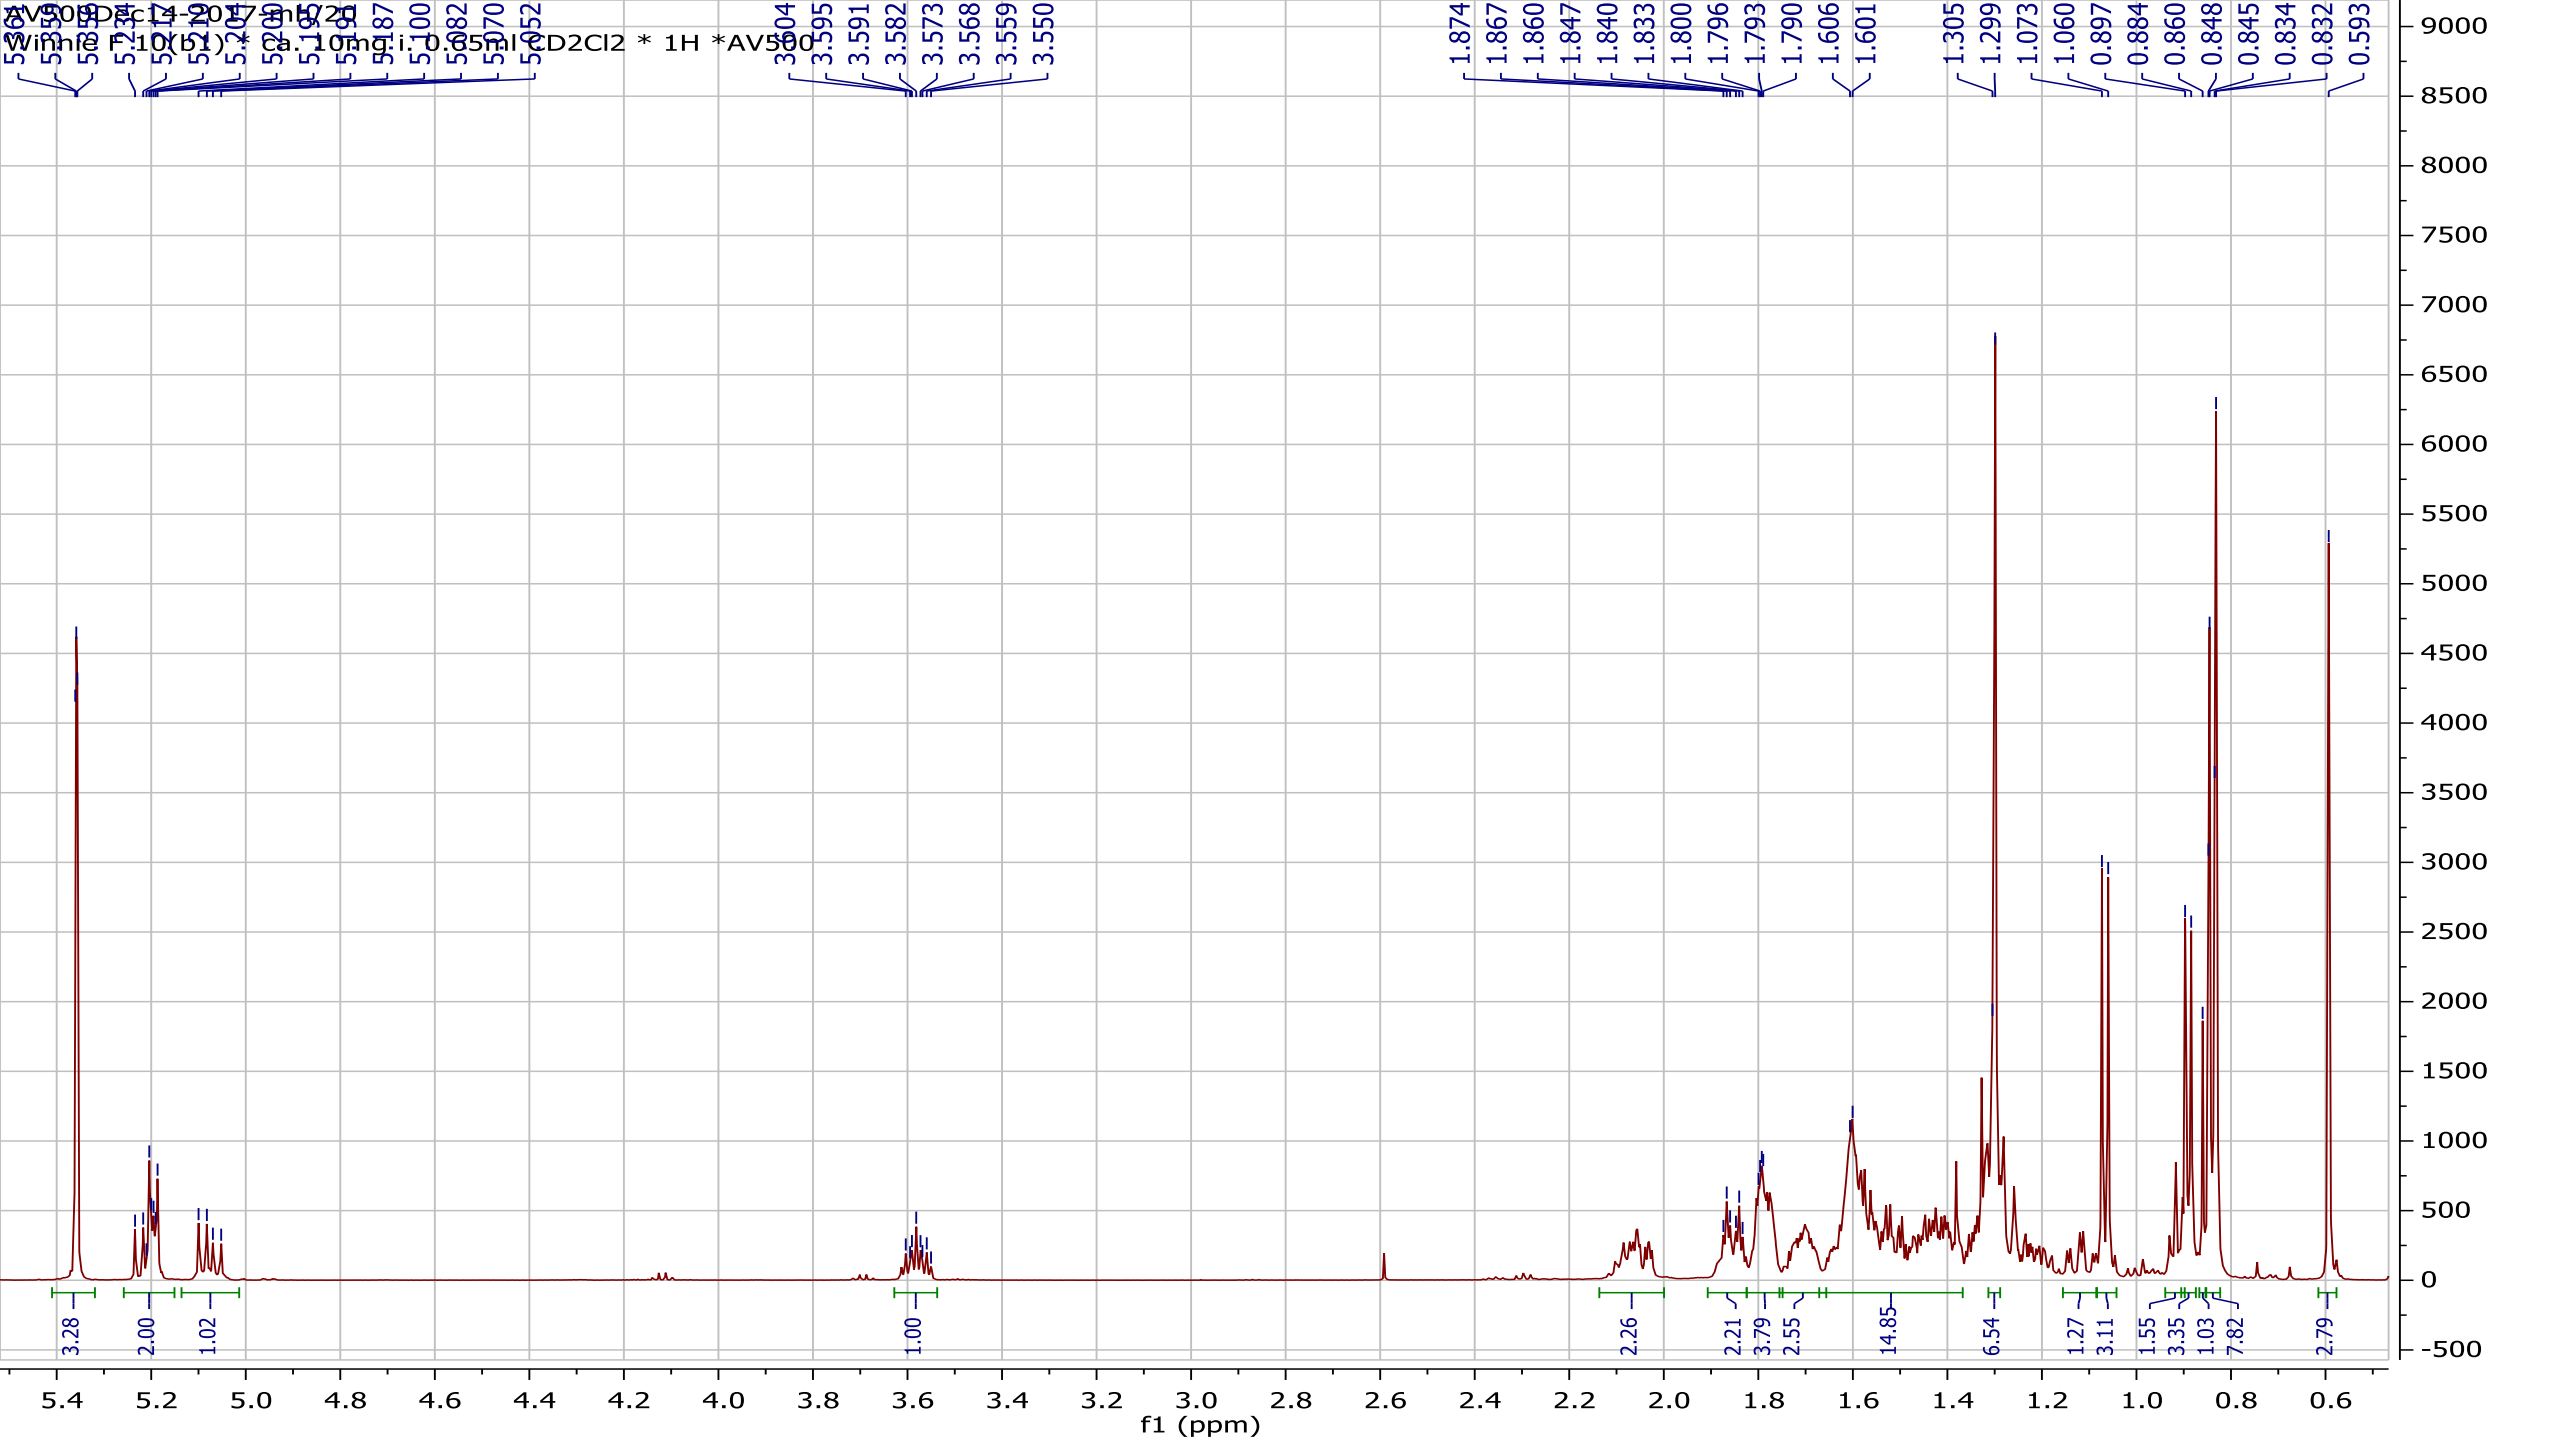



AV500Dec21 2017-mh/24  
Winnie F 10 (b) \* ca. 10mg i. 0.65ml CD2Cl2 \* 13C \* AV500

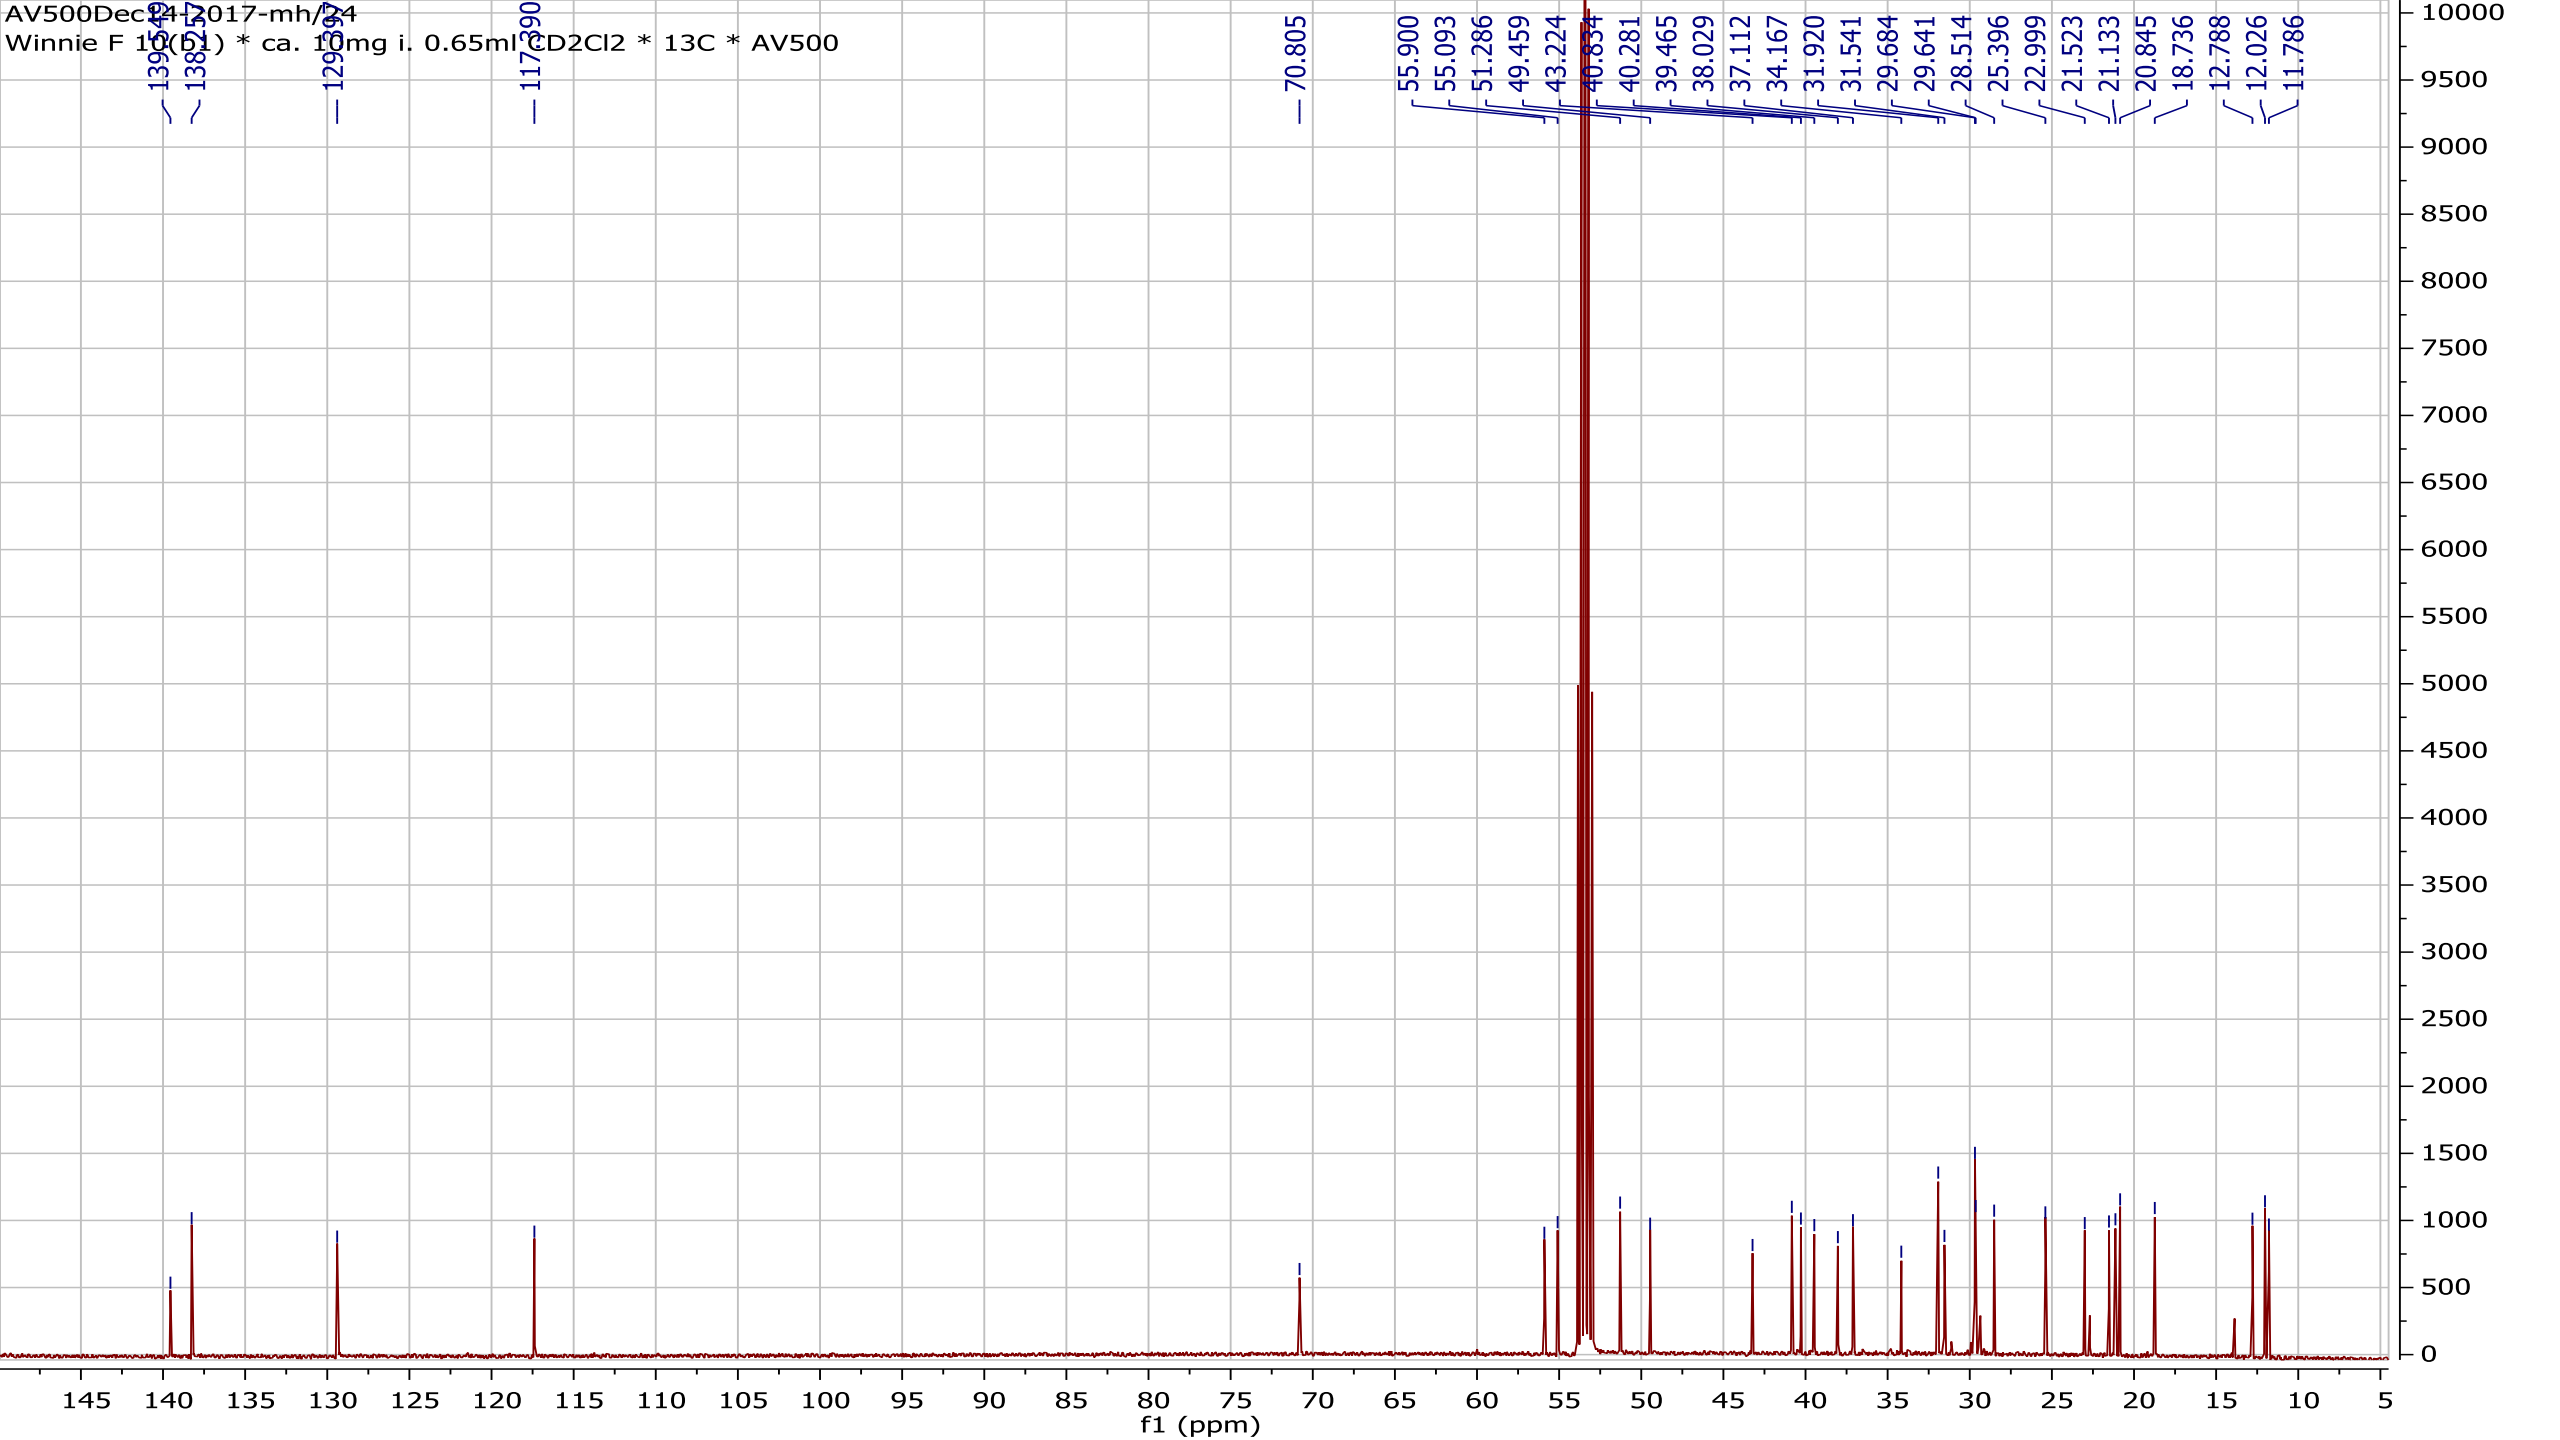

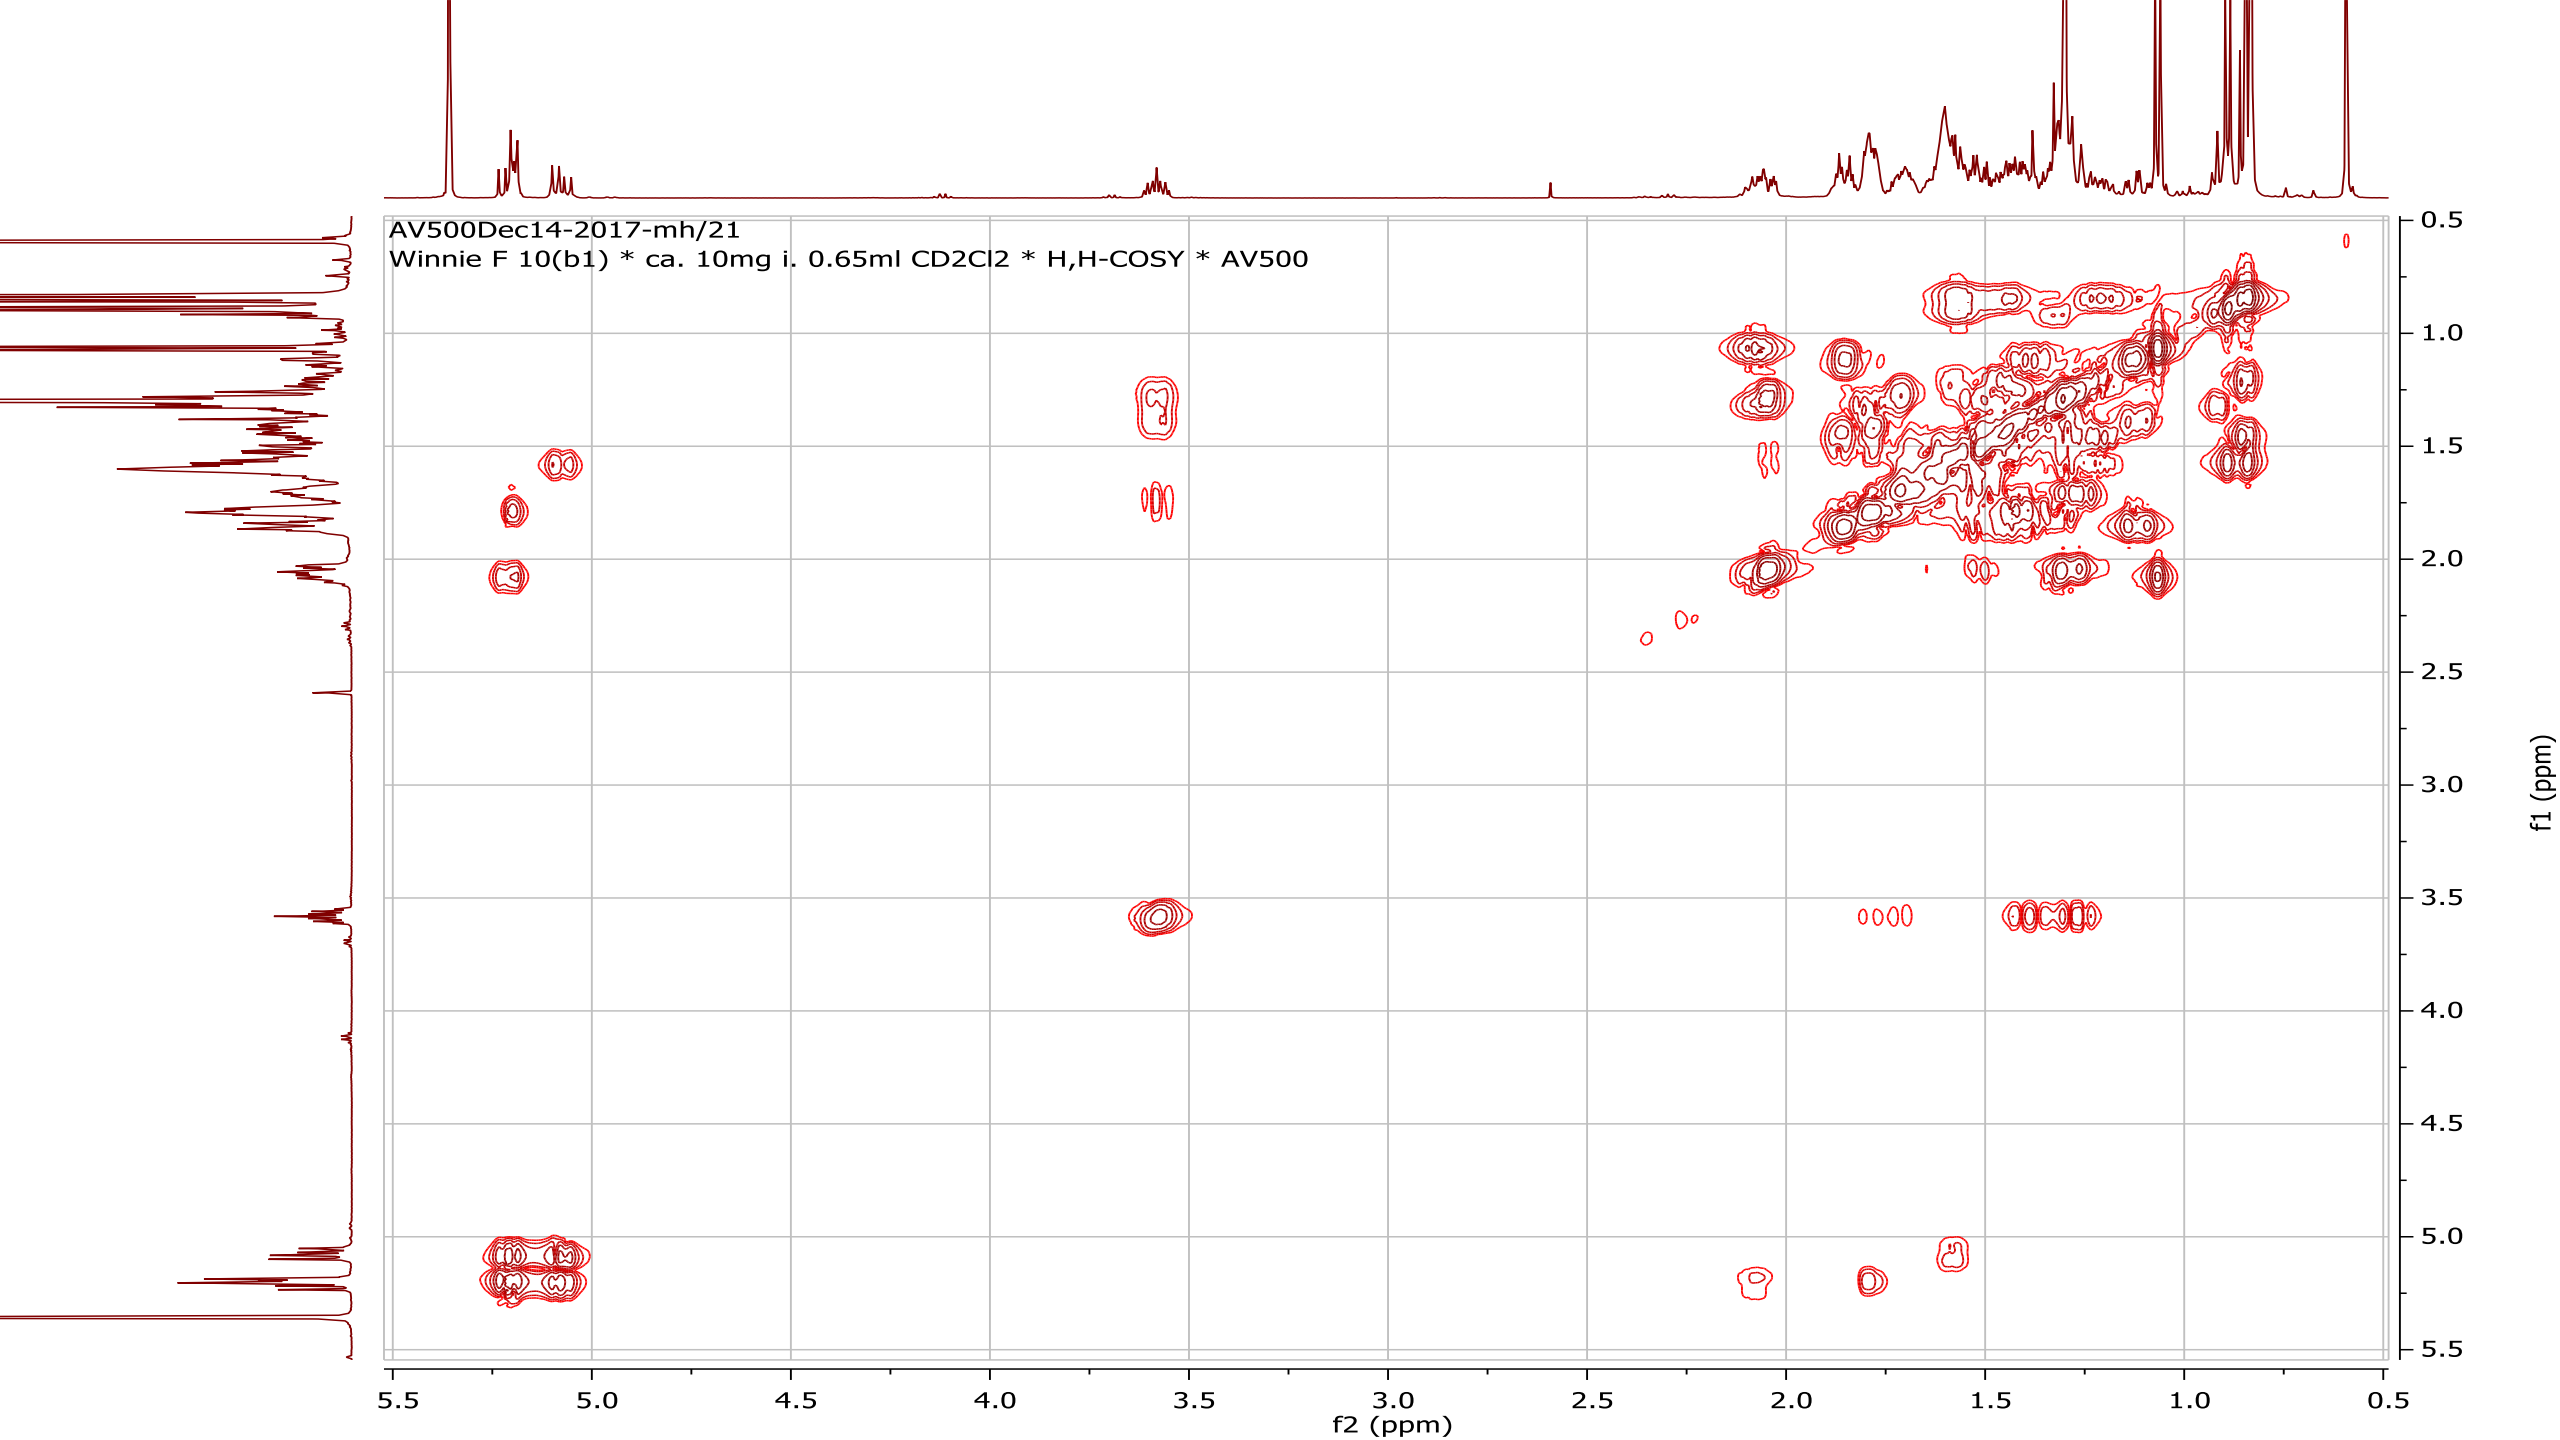

AV500Dec14-2017-mh/22  
Winnie F 10(b1) \* ca. 10mg i. 0.65ml CD2Cl2 \* ed. HSQC \* AV500

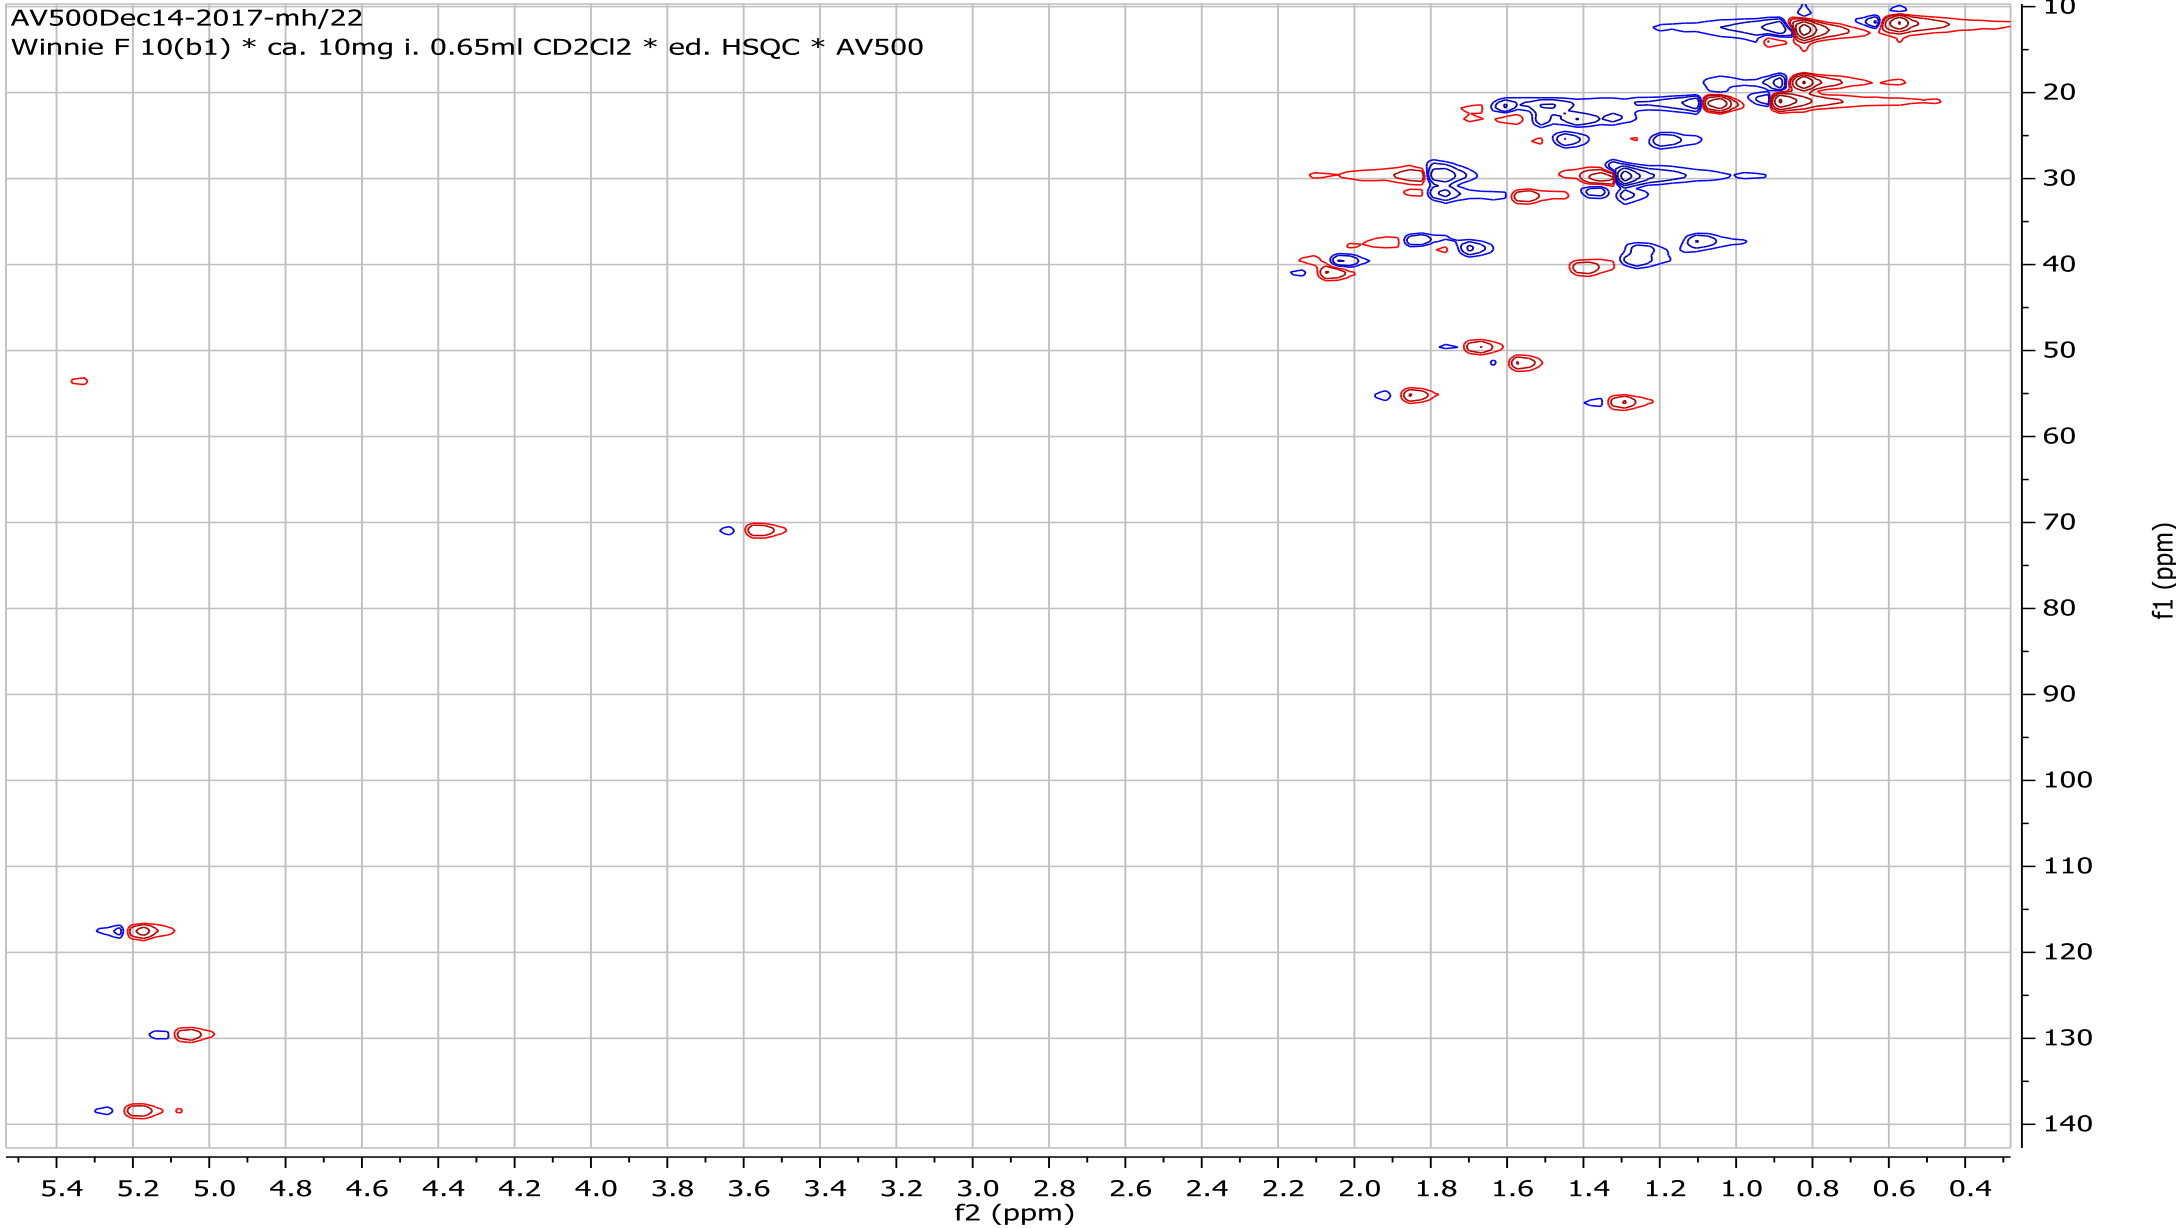

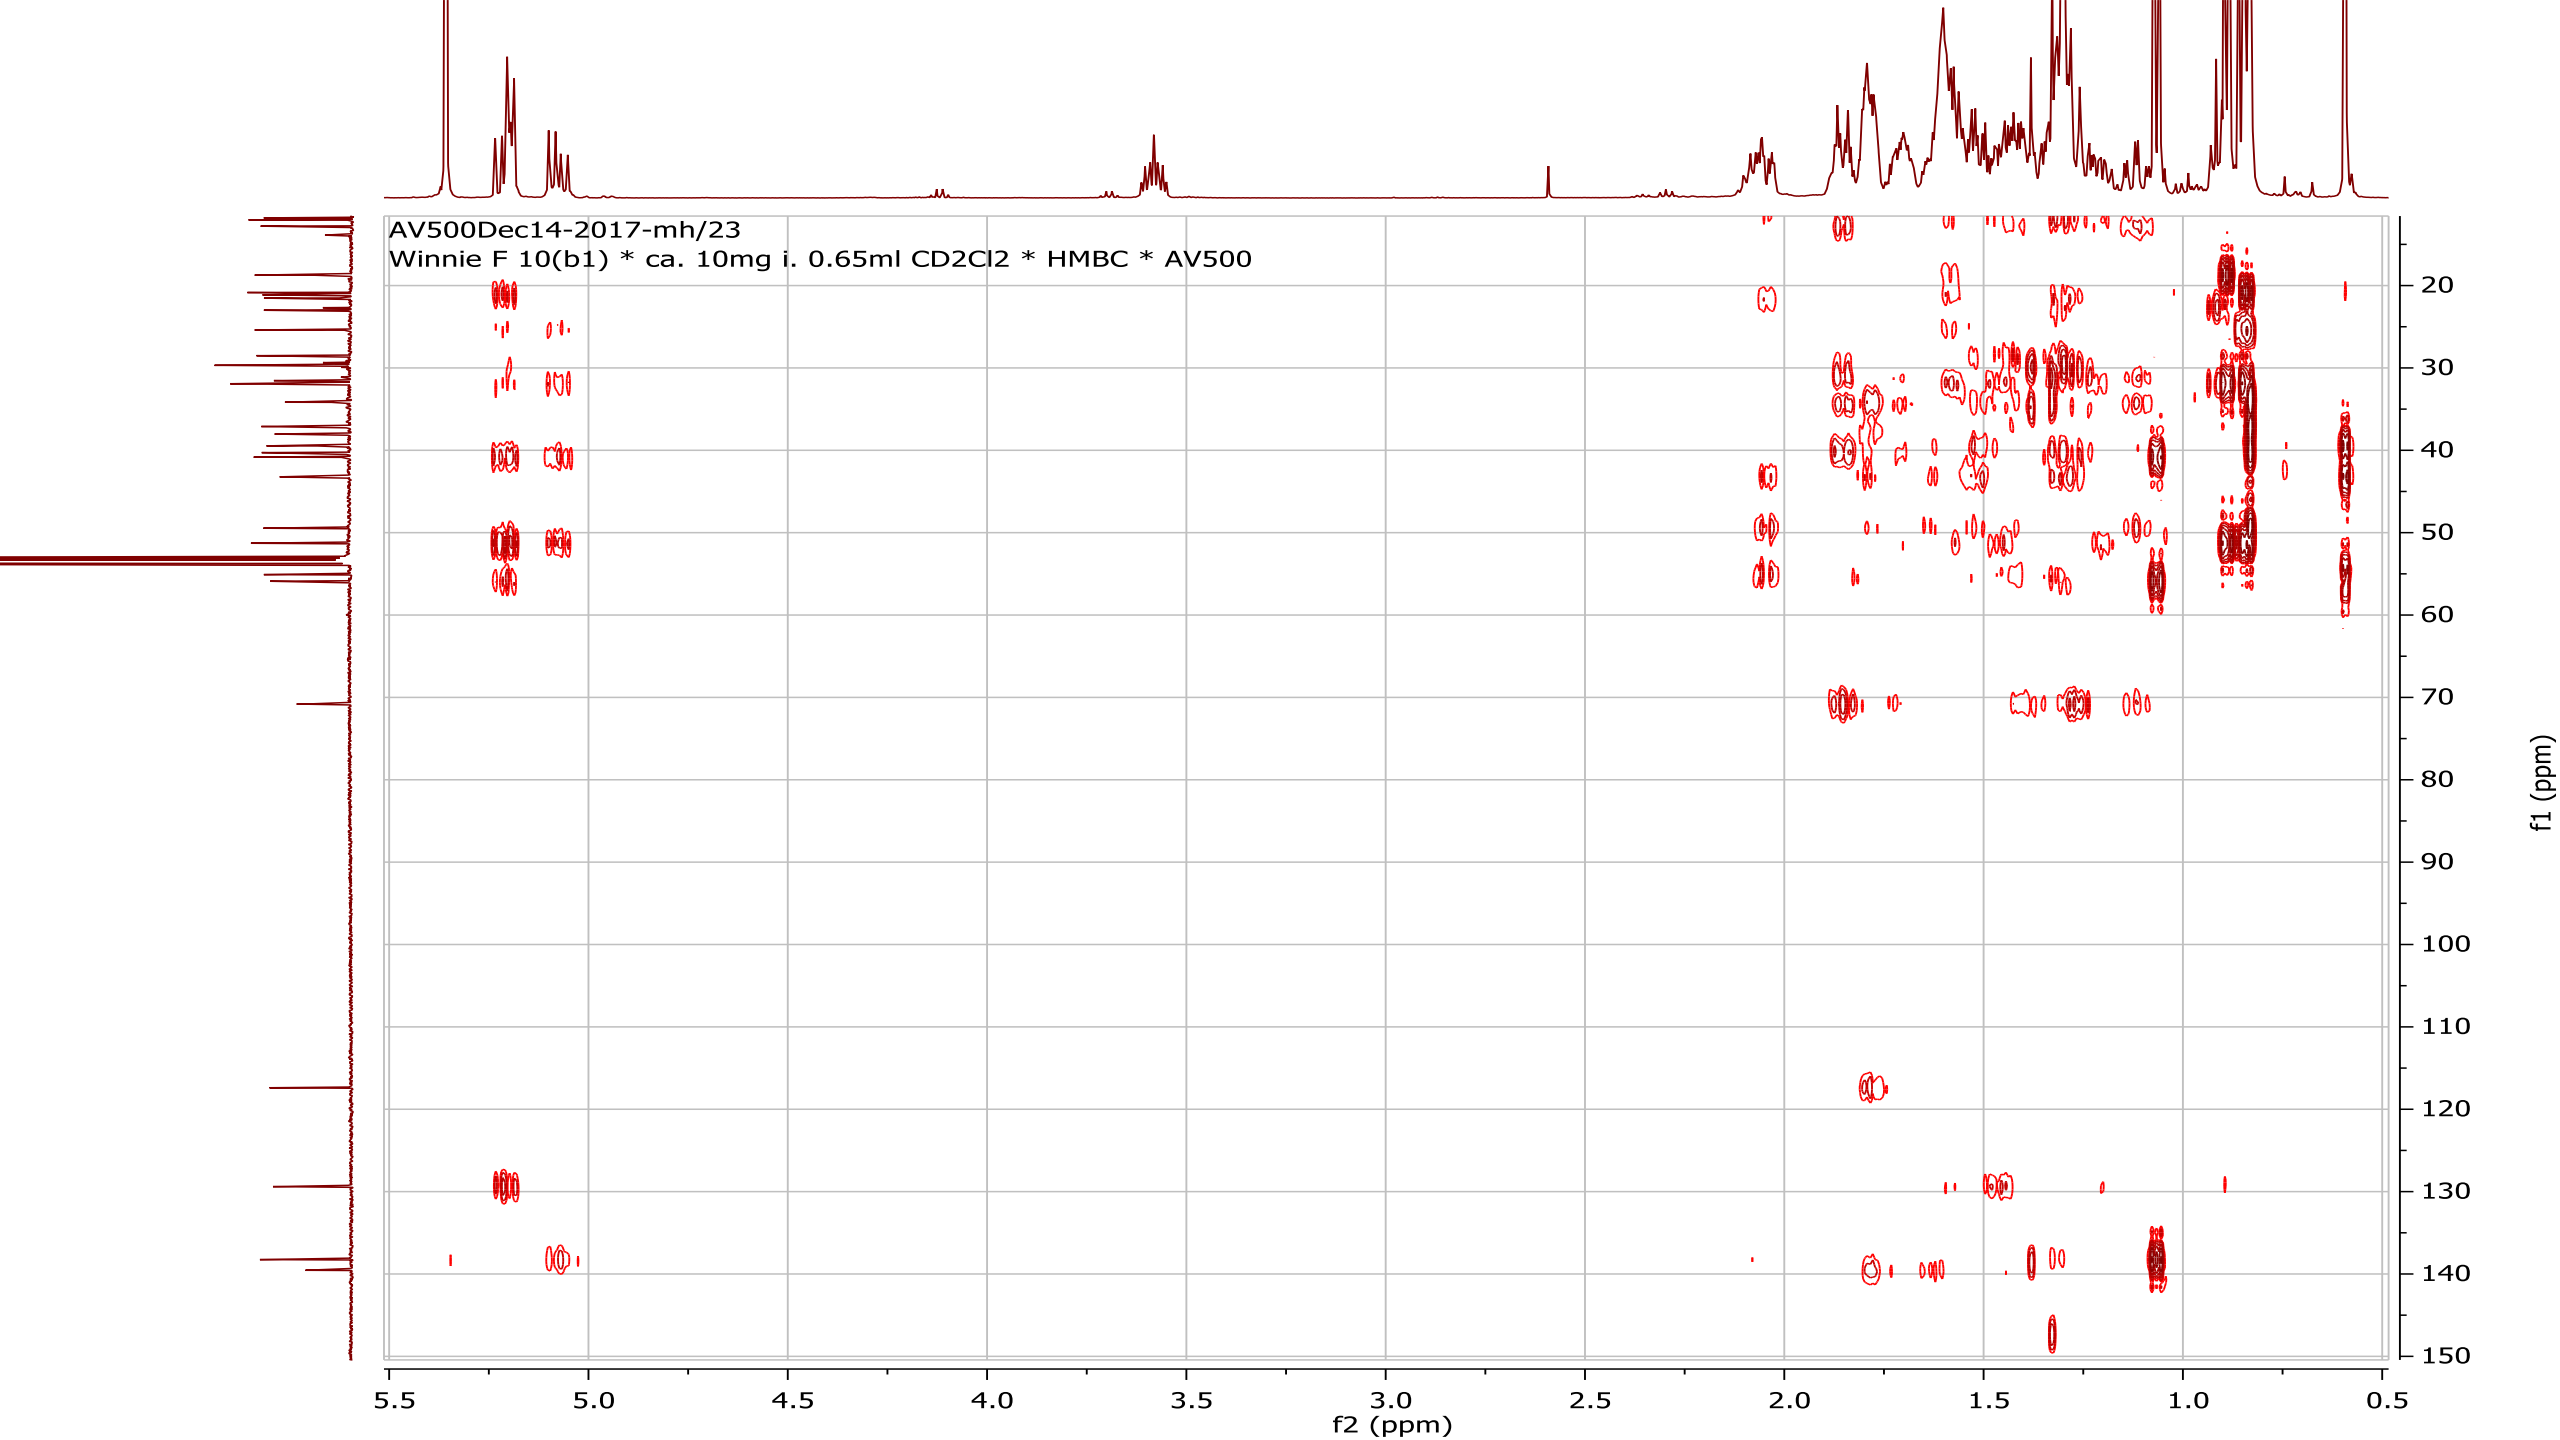



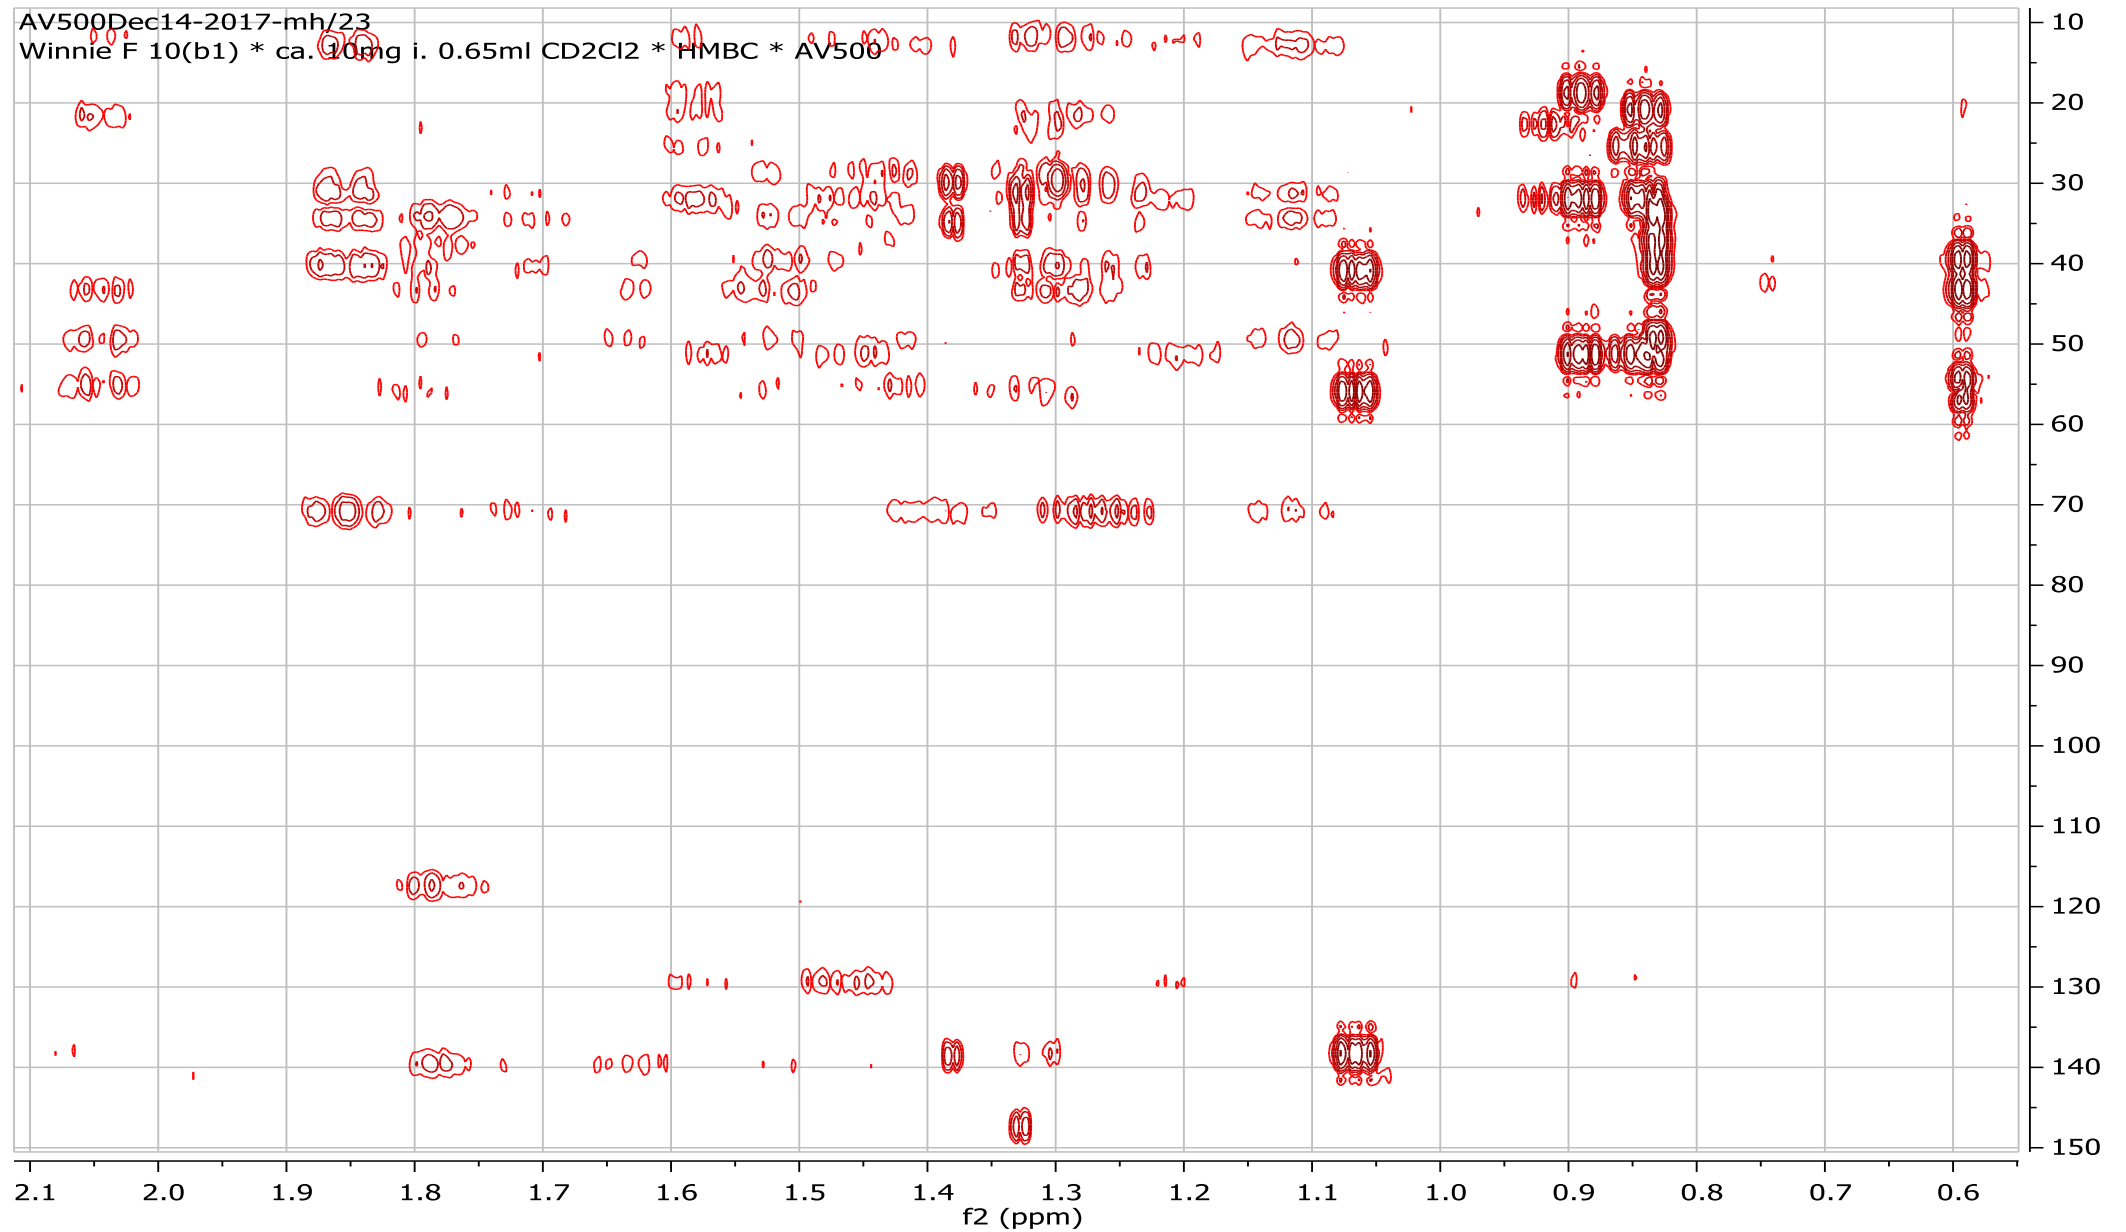

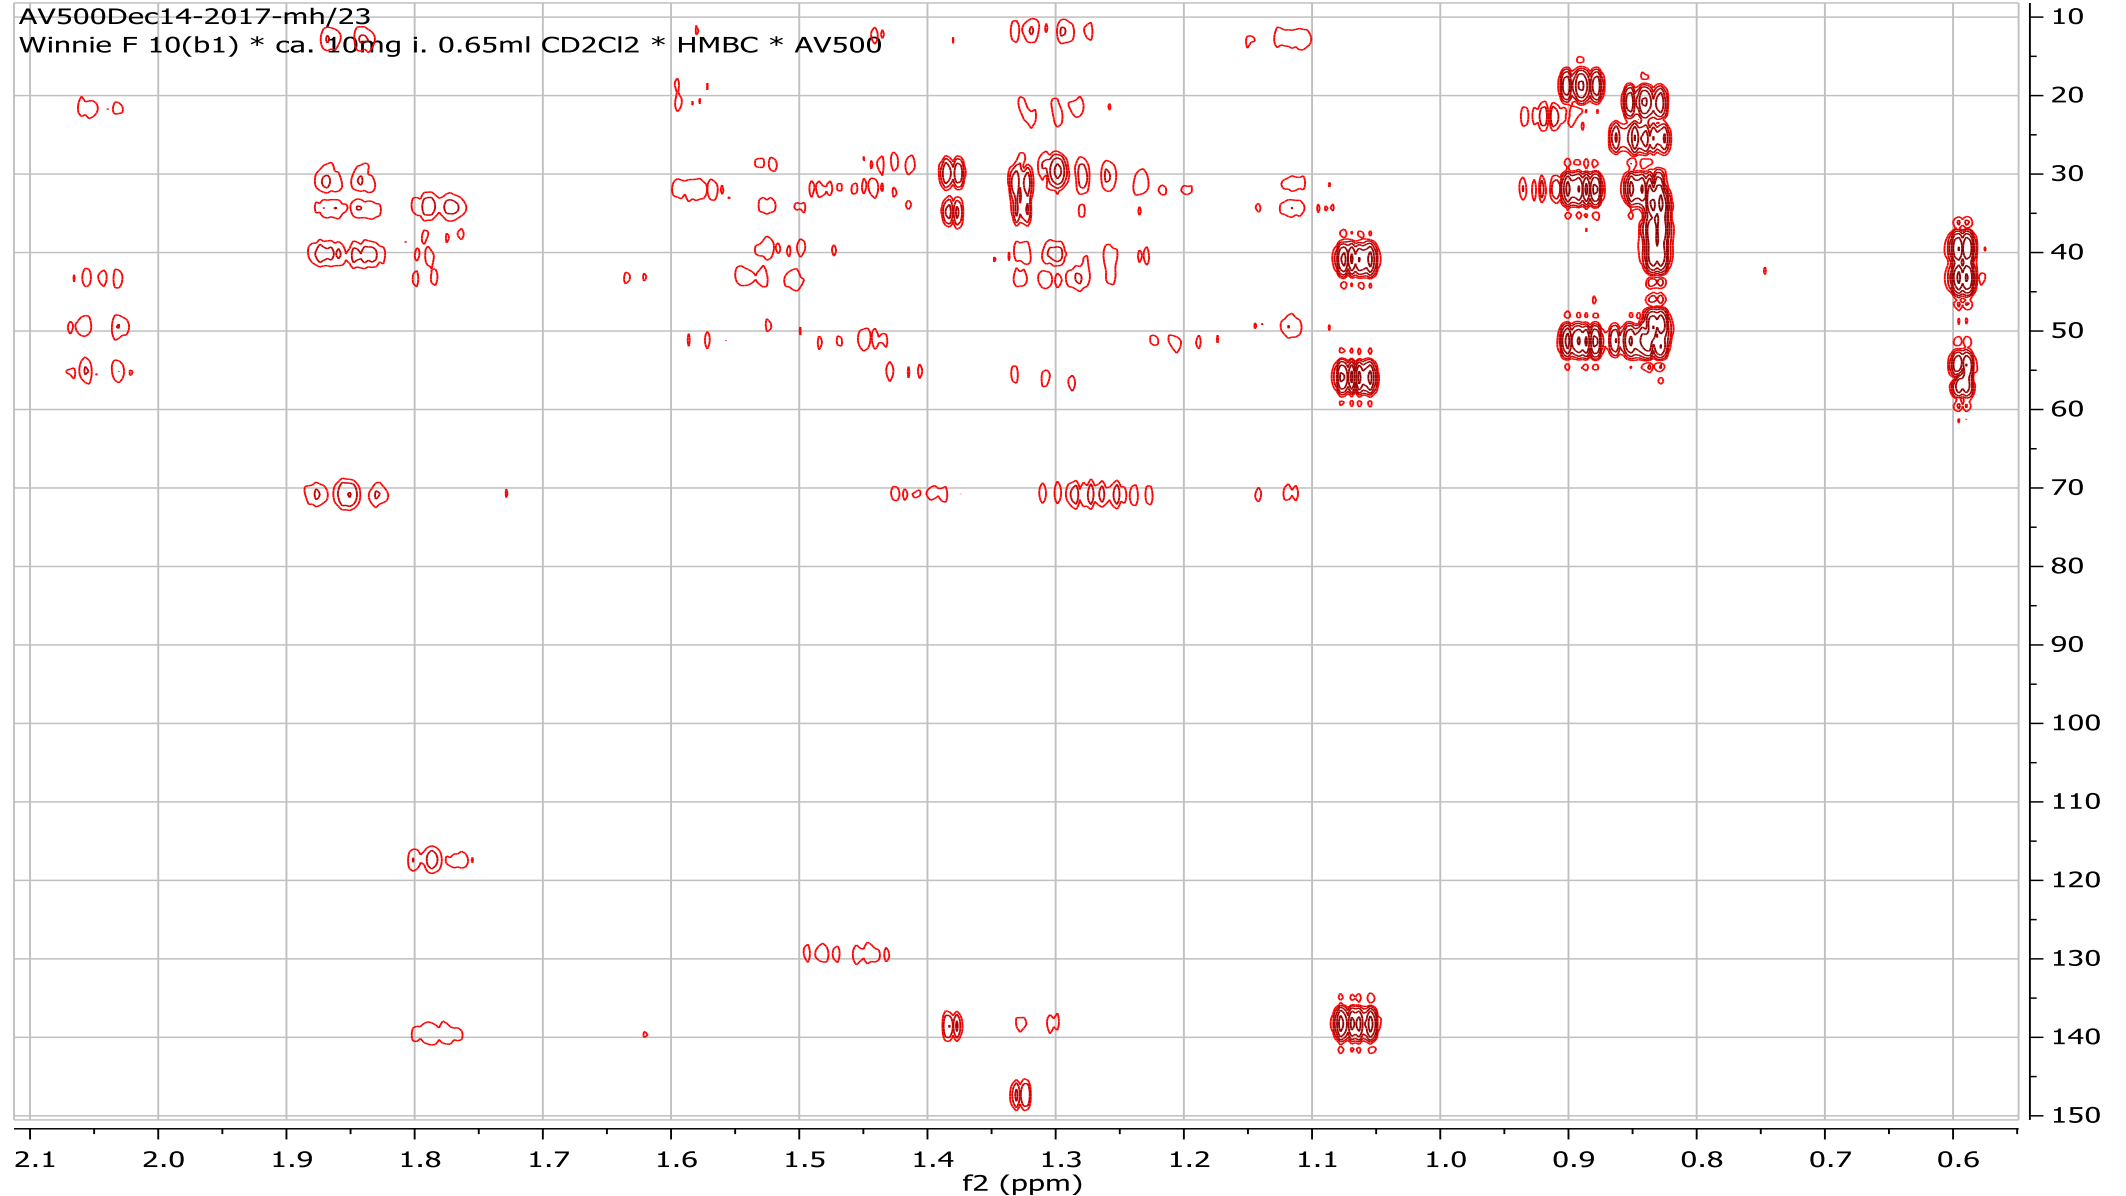

AV500Dec14-2017-mh/25  
Winnie F 10(b1) \* ca. 10mg i. 0.65ml CD2Cl2 \* NOESY, mixing time 0.8 s \* AV500

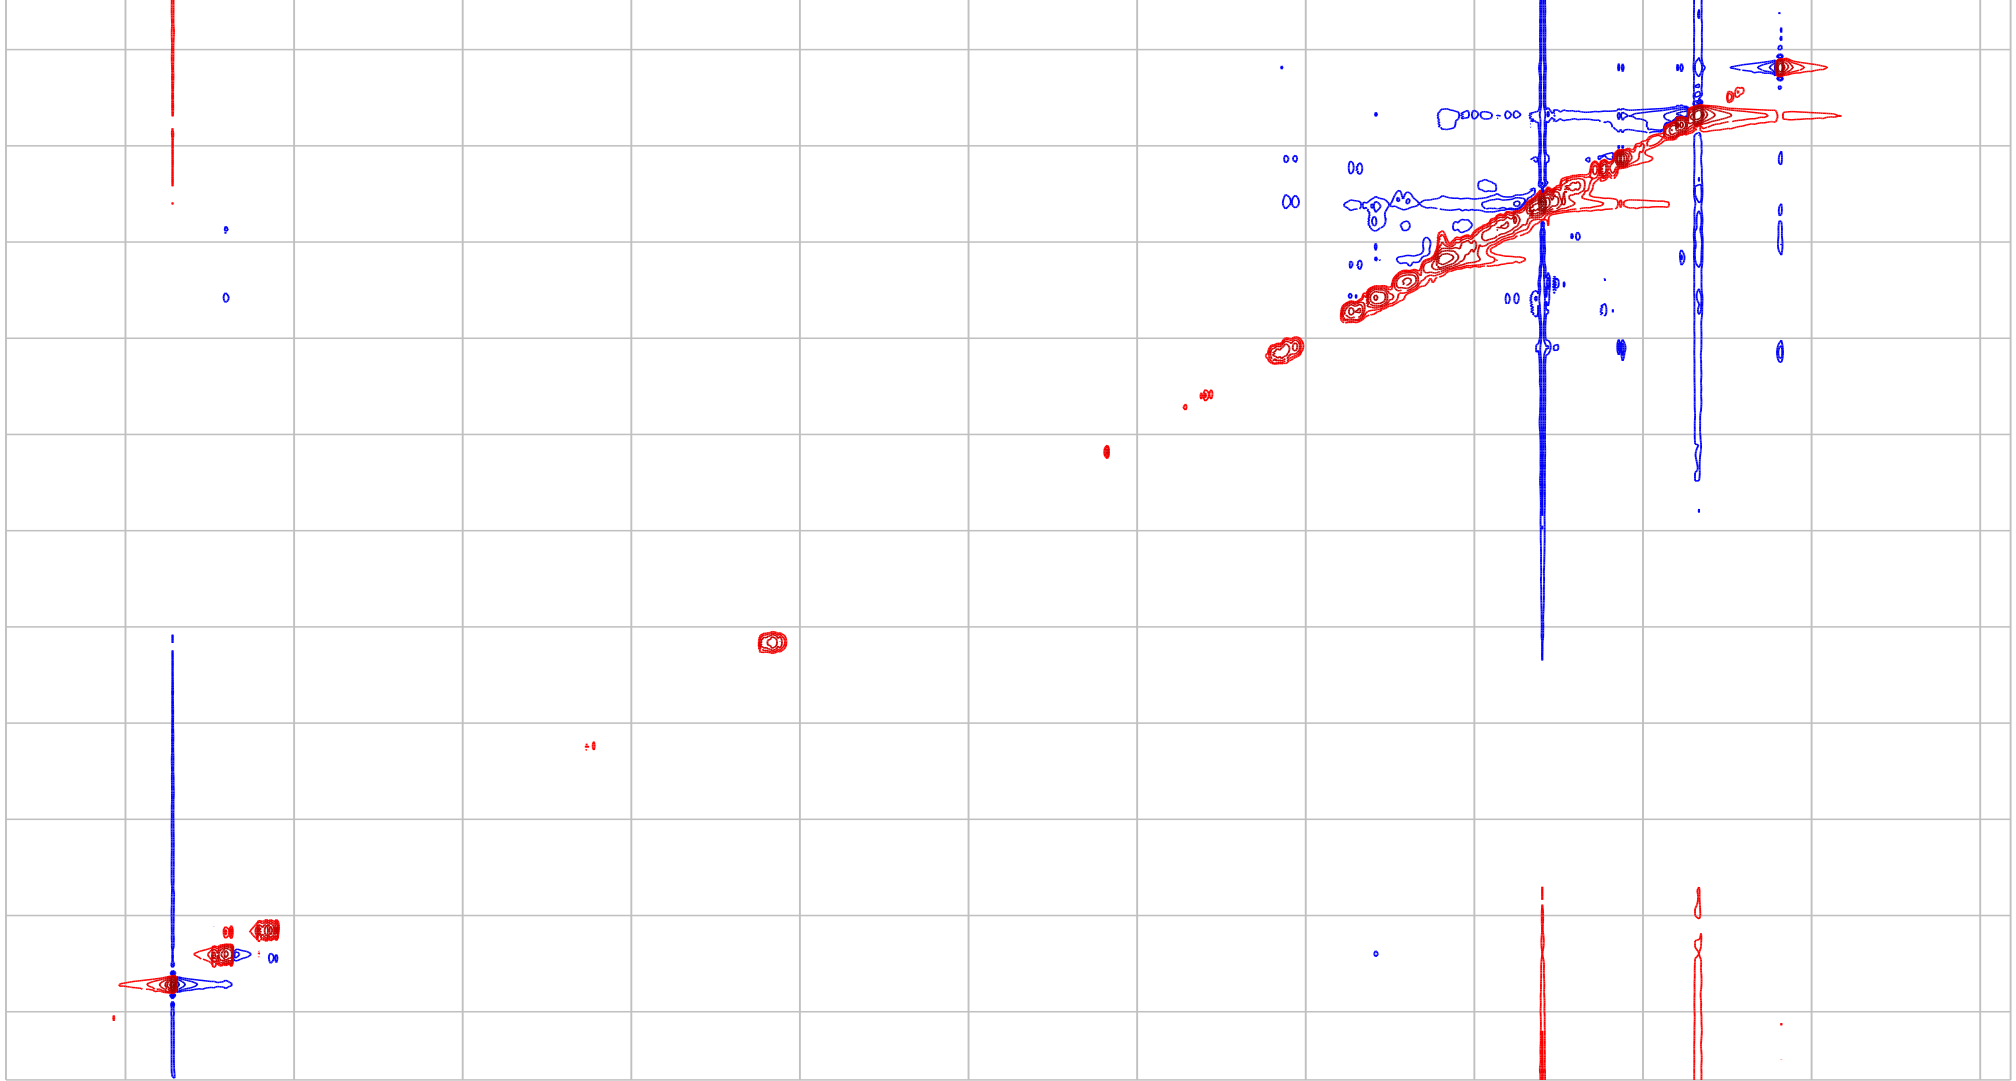

f1 (ppm)

f2 (ppm)
